# Supplementary material for: Computational comparison of two mouse draft genomes and the human golden path
Source: Springer Nature journal article supplement (doi:10.1186/gb-2002-4-1-r1), 2002-12-05
Supplement: Additional file 1 [file gb-2002-4-1-r1-s1.pdf]

**Supporting online material:**

**Supporting figure legends:**

Figure S1. Correlation between portion of CSEs and chromosome length of one chromosome in the whole genome. Chromosome index is labeled beside the black box, which the x-coordinate is the portion of chromosome length and the y-coordinate is the portion of CSEs' number of this chromosome in the aCSE-hp set.

Supporting figures:

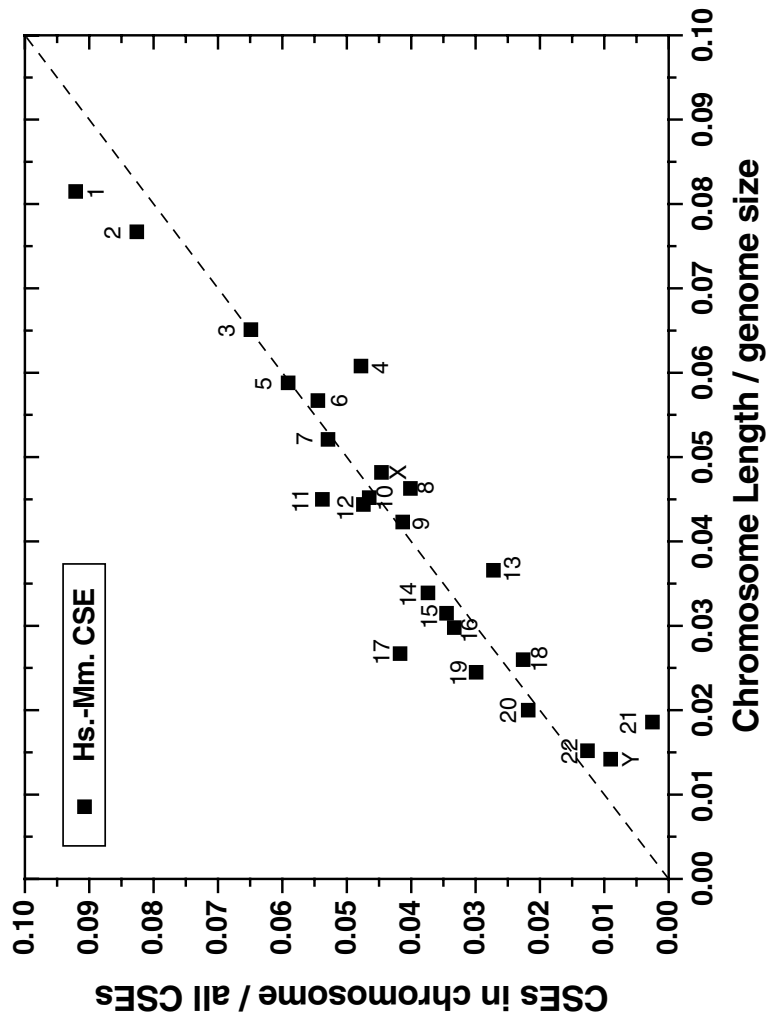

Figure S1.

**Supporting table:****S1.** Ten longest intron region CSEs.

| CSE ID         | Human Chromosome location   | Length (bp) | Associated match                                    |
|----------------|-----------------------------|-------------|-----------------------------------------------------|
| chr11p_0028203 | chr11: 71708111 - 71711102  | 2992        | Unspliced human ESTs                                |
| chr19c_0142755 | chr19:895436 - 897995       | 2560        | Spliced human ESTs                                  |
| chr2p_0047644  | chr2:99316807 - 99319014    | 2208        | Spliced human ESTs                                  |
| chr1c_0024330  | chr1:246028930 - 246030945  | 2016        | -                                                   |
| chr3p_0046066  | chr3:117127943 - 117129830  | 1888        | Unspliced human ESTs                                |
| chr5p_0000062  | chr5: 19343518 - 19345358   | 1841        | Unspliced human ESTs &<br>Mouse novel gene MGC:6709 |
| chr14p_0006612 | chr14: 32856036 - 32857814  | 1779        | Unspliced human ESTs                                |
| chr3p_0049903  | chr3: 126494803 - 126496496 | 1694        | Unspliced human ESTs &<br>Mouse novel gene MGC:7530 |
| chr1p_0072128  | chr1: 81639827 - 81641515   | 1689        | Unspliced human ESTs                                |
| chr11p_0014516 | chr11: 57009057 - 57010725  | 1669        | Human ESTs &<br>Mouse novel gene BC010294           |

**S2. 396** mouse genomic segments and their matched human segment pairs. “mChr” means the mouse chromosome, and “hChr” means the human chromosome. The percent identity of two human segments is calculated by program AVID (1).

| mChr                                                                              | Mouse genome location | hChr | Strand | Human genome location | hChr | Strand | Human genome location | Identity |
|-----------------------------------------------------------------------------------|-----------------------|------|--------|-----------------------|------|--------|-----------------------|----------|
| 67 mouse genomic segments and their matched human segments displayed in figure 5. |                       |      |        |                       |      |        |                       |          |
| 1                                                                                 | 33485652-33550500     | 6    | -      | 61320409-61380640     | 6    | -      | 62328761-62388758     | 95.9     |
| 1                                                                                 | 33630694-33662833     | 6    | -      | 61210413-61238554     | 6    | -      | 62220883-62249266     | 97.9     |
| 1                                                                                 | 132180038-132254146   | 1    | -      | 148578731-148648693   | 1    | -      | 148798412-148868054   | 99.5     |
| 1                                                                                 | 133494130-133506873   | 1    | -      | 209595851-209610304   | 5    | +      | 130960905-130975233   | 99.0     |
| 1                                                                                 | 145746604-145785136   | 1    | -      | 194544196-194565890   | 1    | -      | 198503968-198525678   | 99.9     |
| 1                                                                                 | 154257467-154268231   | 1    | -      | 184402294-184414776   | 1    | +      | 184744215-184756697   | 100.0    |
| 2                                                                                 | 24777175-24796022     | 2    | +      | 92200253-92219722     | 2    | +      | 115243500-115262849   | 95.7     |
| 2                                                                                 | 24799805-24814874     | 2    | +      | 92222934-92236607     | 2    | +      | 115266554-115279830   | 95.7     |
| 2                                                                                 | 123138388-123149890   | 15   | -      | 40154993-40167946     | 15   | -      | 40296561-40309473     | 99.8     |
| 2                                                                                 | 128223321-128237963   | 2    | -      | 92790205-92807924     | 16   | -      | 13532378-13550097     | 100.0    |
| 2                                                                                 | 143368528-143394655   | 16   | -      | 89875148-89894908     | 20   | +      | 15941028-15960781     | 99.9     |
| 3                                                                                 | 97153322-97171806     | 1    | +      | 141924745-141938660   | 1    | +      | 141967717-141981637   | 99.8     |
| 3                                                                                 | 98373179-98399364     | 1    | -      | 147457112-147484312   | 1    | -      | 147718098-147745264   | 99.1     |
| 3                                                                                 | 101541810-101553215   | 1    | -      | 123148825-123159860   | 1    | -      | 193735832-193746778   | 97.4     |
| 3                                                                                 | 147908866-147921011   | 7    | -      | 77654556-77674929     | 7    | -      | 77904285-77924268     | 98.7     |
| 3                                                                                 | 148004004-148035616   | 1    | +      | 86147603-86170562     | 7    | -      | 77549985-77572834     | 98.4     |

|   |                     |    |   |                     |    |   |                     |      |
|---|---------------------|----|---|---------------------|----|---|---------------------|------|
| 3 | 148111168-148154033 | 1  | + | 86265481-86320099   | 7  | - | 77409191-77463737   | 97.9 |
| 4 | 9561015-9691805     | 8  | - | 93915595-94006154   | 8  | + | 97085660-97180478   | 99.8 |
| 4 | 61694155-61712980   | 9  | - | 109465073-109482256 | 9  | + | 109538142-109555331 | 99.4 |
| 4 | 120541312-120560843 | 1  | + | 39901989-399233500  | 1  | - | 40039988-40061499   | 99.9 |
| 4 | 151166458-151182829 | 1  | - | 584770-605830       | 1  | - | 621805-642861       | 99.9 |
| 5 | 25500953-25609946   | 7  | - | 155800789-155918595 | 7  | - | 156137393-156251446 | 96.3 |
| 5 | 86280078-86299464   | 4  | - | 70010721-70044609   | 4  | - | 70138218-70172102   | 99.7 |
| 5 | 94135265-94148120   | 4  | + | 79405588-79420675   | 4  | + | 79472702-79487793   | 99.7 |
| 5 | 134615936-134636726 | 7  | + | 76979438-77002530   | 7  | + | 77707357-77732493   | 98.7 |
| 6 | 41746456-41798427   | 7  | + | 146825642-146873023 | 7  | - | 146922044-146969430 | 83.1 |
| 6 | 117008801-117038177 | 10 | + | 51022066-51055395   | 10 | + | 51225173-51258456   | 99.1 |
| 6 | 122063768-122077242 | 22 | + | 15684842-15696287   | 22 | - | 17520413-17531816   | 98.2 |
| 6 | 126522658-126539572 | 12 | - | 5962552-5976623     | 22 | - | 14215387-14229385   | 97.0 |
| 6 | 147700116-147719054 | 12 | + | 29380143-29400486   | 12 | - | 33206494-33228842   | 87.5 |
| 7 | 3126458-3139133     | 19 | + | 71857638-71870733   | 19 | + | 72048708-72061805   | 99.9 |
| 7 | 35605213-35634666   | 16 | - | 14005595-14049412   | 16 | + | 14979553-15023093   | 98.9 |
| 7 | 35647524-35659126   | 16 | + | 15035295-15045799   | 16 | + | 15054376-15064882   | 99.6 |
| 7 | 69952754-69999868   | 15 | + | 87951419-88004237   | 15 | - | 88250413-88304340   | 99.9 |
| 7 | 71117431-71131739   | 15 | + | 78991064-79005619   | 15 | + | 79849426-79864004   | 99.9 |
| 7 | 99261377-99300737   | 11 | + | 8464112-8512297     | 11 | + | 8785766-8833882     | 99.8 |

|    |                     |    |   |                     |    |   |                     |       |
|----|---------------------|----|---|---------------------|----|---|---------------------|-------|
| 7  | 106302001-106315143 | 16 | + | 13425186-13441692   | 16 | + | 13806485-13822944   | 98.6  |
| 8  | 64185278-64199709   | 4  | + | 120339885-120353837 | 4  | - | 162823998-162837005 | 97.4  |
| 8  | 105222768-105235468 | 16 | + | 69891191-69906139   | 16 | + | 70116352-70131300   | 100.0 |
| 8  | 110391635-110410191 | 16 | - | 73929003-73946638   | 16 | - | 74163187-74180858   | 99.4  |
| 8  | 111011078-111037269 | 16 | + | 72900244-72921567   | 16 | + | 77668765-77690137   | 98.1  |
| 9  | 55531450-55546184   | 15 | + | 75530732-75546644   | 15 | - | 75595757-75611686   | 99.9  |
| 9  | 114782706-114801175 | 15 | + | 18338055-18355668   | 15 | + | 19673383-19691038   | 98.3  |
| 10 | 4601564-4643453     | 5  | + | 153006161-153045559 | 6  | + | 159171048-159210549 | 99.9  |
| 11 | 62100745-62114127   | 17 | - | 17482717-17501341   | 17 | - | 18326390-18346392   | 99.9  |
| 11 | 70162375-70177242   | 17 | - | 7932013-7953938     | 17 | - | 8155205-8177189     | 99.3  |
| 11 | 87882981-87906333   | 17 | - | 60831102-60861325   | 17 | - | 60959706-60989930   | 100.0 |
| 11 | 104158365-104179058 | 17 | + | 54264264-54289063   | 17 | + | 54402760-54427567   | 98.2  |
| 11 | 104647555-104696180 | 17 | - | 47441120-47503744   | 17 | - | 47658742-47721360   | 99.8  |
| 11 | 112040928-112125269 | 17 | + | 71432776-71487469   | 17 | + | 72793831-72848471   | 99.8  |
| 11 | 119636562-119676366 | 17 | + | 80978228-81030856   | 17 | - | 81210864-81263524   | 100.0 |
| 12 | 55640091-55693709   | 14 | + | 39508033-39559289   | 14 | + | 40413473-40464674   | 99.7  |
| 12 | 106674014-106704453 | 13 | + | 22134624-22169534   | 13 | - | 23640937-23678753   | 89.1  |
| 13 | 35950118-35971157   | 6  | + | 8488212-8517310     | 13 | - | 20396689-20423485   | 90.8  |
| 13 | 55689020-55704683   | 5  | + | 135861529-135876648 | 5  | - | 136970074-136985188 | 81.7  |
| 14 | 42168404-42195401   | 14 | - | 17641584-17675286   | 15 | - | 19131734-19168760   | 94.9  |

|                                                             |                     |    |   |                     |    |   |                     |       |
|-------------------------------------------------------------|---------------------|----|---|---------------------|----|---|---------------------|-------|
| 15                                                          | 90414314-90428226   | 2  | - | 115571817-115606327 | 22 | + | 47786507-47819219   | 95.9  |
| 16                                                          | 16749683-16760143   | 22 | + | 17855196-17871863   | 22 | + | 18620452-18637119   | 97.9  |
| 17                                                          | 33206466-33226857   | 6  | - | 27260197-27290710   | 6  | - | 42818931-42849411   | 99.7  |
| 18                                                          | 4949630-4960858     | 10 | - | 29307367-29320195   | 10 | + | 30517906-30531495   | 91.3  |
| 18                                                          | 14645553-14663282   | 18 | - | 23832886-23853361   | 18 | + | 24479586-24500060   | 100.0 |
| 18                                                          | 38852599-38888562   | 5  | - | 143093665-143127184 | 5  | - | 143206277-143239797 | 78.5  |
| 18                                                          | 43253435-43275238   | 5  | + | 149554621-149572957 | 5  | + | 149615462-149633795 | 67.3  |
| 18                                                          | 59244481-59262809   | 5  | + | 134676141-134708385 | 5  | - | 161119161-161151406 | 100.0 |
| 18                                                          | 81535097-81547521   | 18 | - | 80260396-80273428   | 18 | - | 803221119-80334150  | 100.0 |
| 19                                                          | 9701787-9726527     | 11 | - | 70147394-70169355   | 11 | - | 70375575-70397549   | 99.9  |
| 19                                                          | 24694439-24730836   | 9  | + | 13854638-13901149   | 9  | + | 15368182-15414998   | 99.7  |
| 329 mouse genomic segments and their matched human segments |                     |    |   |                     |    |   |                     |       |
| 1                                                           | 39702407-39715321   | 2  | - | 97059847-97074260   | 2  | + | 97515062-97529475   | 100.0 |
| 1                                                           | 47970800-48029545   | 2  | - | 194180804-194237869 | 2  | - | 194304101-194356451 | 99.3  |
| 1                                                           | 95154136-95170855   | 5  | + | 99388478-99409491   | 5  | + | 99687067-99708074   | 99.8  |
| 1                                                           | 98501411-98582394   | 5  | - | 102684453-102762963 | 5  | + | 102852557-102931334 | 99.9  |
| 1                                                           | 132256810-132268165 | 1  | - | 148554259-148568664 | 1  | - | 148773989-148788368 | 99.5  |
| 1                                                           | 133447502-133461118 | 1  | - | 209554069-209566216 | 1  | - | 209641064-209653211 | 100.0 |
| 1                                                           | 136227623-136243202 | 1  | + | 205781976-205798095 | 1  | - | 206217126-206232581 | 99.4  |
| 1                                                           | 144102821-144119799 | 1  | - | 196012507-196033852 | 1  | + | 197296952-197318297 | 100.0 |

|   |                     |    |   |                     |    |   |                      |       |
|---|---------------------|----|---|---------------------|----|---|----------------------|-------|
| 1 | 151272247-151295580 | 1  | - | 186333241-186367123 | 1  | - | 188203857-188236783  | 90.3  |
| 1 | 152516028-152614671 | 1  | - | 186381292-186494030 | 1  | - | 186662736-186781487  | 99.8  |
| 1 | 182377602-182389802 | 1  | - | 216231017-216247618 | 1  | - | 216320602-216337217  | 99.6  |
| 1 | 187886964-187904955 | 1  | - | 229355864-229367049 | 1  | - | 229746729-229757914  | 100.0 |
| 1 | 190057280-190070055 | 1  | + | 225815592-225828262 | 3  | + | 11008-23671          | 99.7  |
| 1 | 196360245-196373156 | 1  | - | 218163746-218176617 | 1  | - | 218478953-218491797  | 99.7  |
| 2 | 18834365-18844824   | 10 | - | 22518610-22529976   | 10 | - | 23524640-23536006    | 100.0 |
| 2 | 25114469-25161978   | 9  | - | 132334819-132400602 | 9  | - | 132650739-132716387  | 99.4  |
| 2 | 25211748-25235865   | 9  | - | 132200551-132223866 | 9  | - | 132414167-132437493  | 100.0 |
| 2 | 27673005-27693973   | 9  | + | 128249723-128274474 | 9  | + | 128912301-128937094  | 99.5  |
| 2 | 28863597-28888675   | 9  | - | 127548529-127579691 | 9  | + | 127729931-127760784  | 99.9  |
| 2 | 30507778-30524403   | 9  | + | 123305207-123324692 | 9  | + | 123460683-123480190  | 99.7  |
| 2 | 34149483-34185593   | 9  | - | 120585220-120623365 | 9  | + | 122174705-122212432  | 62.5  |
| 2 | 45468326-45560180   | 2  | + | 141225567-141321228 | 2  | - | 150271224-150367021  | 100.0 |
| 2 | 52352196-52369784   | 2  | + | 147844232-147863219 | 2  | + | 148293747-148312554  | 99.9  |
| 2 | 54571698-54629263   | 2  | + | 151934000-151975700 | 2  | + | 152477295-152518997  | 91.2  |
| 2 | 59004474-59027326   | 2  | + | 156782826-156802507 | 2  | + | 156844694-1568664381 | 100.0 |
| 2 | 62450964-62481588   | 2  | + | 162401284-162433707 | 2  | + | 163707211-163739633  | 64.6  |
| 2 | 65112018-65123042   | 2  | + | 158390483-158401263 | 2  | + | 158614768-158625549  | 99.9  |
| 2 | 76423423-76471789   | 2  | + | 176388855-176437465 | 2  | + | 176568794-176617410  | 99.9  |

|   |                     |    |   |                     |    |   |                     |       |
|---|---------------------|----|---|---------------------|----|---|---------------------|-------|
| 2 | 85723543-85733548   | 11 | - | 66332755-66345414   | 11 | - | 66971283-66983945   | 99.9  |
| 2 | 92232036-92249194   | 11 | - | 48061327-48080027   | 11 | - | 48559838-48578525   | 99.8  |
| 2 | 103143561-103204319 | 11 | - | 36497012-36597759   | 11 | - | 36925017-37025745   | 94.6  |
| 2 | 107135363-107178677 | 11 | - | 31251435-31306979   | 11 | - | 32925449-32980993   | 99.9  |
| 2 | 107200196-107292141 | 11 | - | 31128256-31230178   | 11 | - | 32800694-32904189   | 99.7  |
| 2 | 107292372-107348517 | 11 | - | 31076512-31128035   | 11 | - | 32748939-32800473   | 99.8  |
| 2 | 123278833-123291771 | 15 | + | 41607953-41621117   | 15 | + | 41662542-41675713   | 99.9  |
| 2 | 127571344-127593764 | 15 | - | 38006376-38027432   | 15 | + | 46953680-46974830   | 85.3  |
| 2 | 134133106-134146611 | 13 | - | 24886528-24904462   | 20 | + | 6211261-6229195     | 100.0 |
| 3 | 25510469-25530726   | 3  | - | 180435313-180448316 | 3  | - | 180475257-180488260 | 99.9  |
| 3 | 25875645-25899653   | 3  | - | 180008332-180034436 | 3  | - | 180225605-180251708 | 53.7  |
| 3 | 25941233-25957778   | 3  | - | 179957535-179970679 | 3  | - | 180206685-180219829 | 100.0 |
| 3 | 32725414-32749686   | 3  | - | 186188722-186216478 | 3  | - | 186243553-186270318 | 99.9  |
| 3 | 90672069-90694923   | 1  | + | 154432955-154450604 | 1  | - | 155121381-155139030 | 100.0 |
| 3 | 96445949-96459184   | 1  | - | 150110676-150126721 | 1  | - | 150130892-150146936 | 75.0  |
| 3 | 108677783-108700624 | 1  | + | 114799350-114823611 | 1  | - | 115296114-115320365 | 99.9  |
| 3 | 108838984-108850343 | 1  | - | 114827376-114839185 | 1  | - | 115124121-115135930 | 100.0 |
| 3 | 109048427-109062357 | 1  | - | 114731792-114748491 | 1  | - | 114894748-114911419 | 100.0 |
| 3 | 116728298-116749967 | 1  | - | 105524169-105554053 | 1  | - | 105686557-105716438 | 100.0 |
| 3 | 121852384-121872088 | 1  | + | 99061228-99081624   | 1  | - | 99481747-99502145   | 99.8  |

|   |                     |   |   |                     |   |   |                     |       |
|---|---------------------|---|---|---------------------|---|---|---------------------|-------|
| 3 | 142820535-142834613 | 4 | - | 95730624-95747217   | 4 | - | 95828318-95844907   | 99.9  |
| 3 | 142861561-142886396 | 4 | - | 95655133-95695030   | 4 | - | 95752776-95792699   | 99.8  |
| 3 | 146229267-146245678 | 1 | - | 88442469-88454903   | 1 | + | 141875422-141887868 | 98.9  |
| 3 | 147828149-147857758 | 1 | - | 86381174-86408784   | 7 | - | 77962260-77989867   | 99.9  |
| 3 | 149068125-149131342 | 1 | - | 92972993-93047231   | 1 | - | 93061227-93138643   | 99.7  |
| 4 | 8490101-8502106     | 8 | - | 72602258-72612904   | 8 | + | 72699816-72710462   | 99.7  |
| 4 | 8725936-8756767     | 8 | + | 72654820-72676898   | 8 | + | 72961373-72983453   | 99.7  |
| 4 | 13793956-13929477   | 8 | - | 92141196-92255251   | 8 | - | 92313959-92425565   | 97.6  |
| 4 | 14499036-14534771   | 8 | - | 91688459-91712010   | 8 | - | 91898692-91923715   | 99.6  |
| 4 | 29111533-29135190   | 4 | - | 2960794-2976151     | 6 | - | 99890564-99906060   | 99.3  |
| 4 | 29161004-29191650   | 4 | + | 2902174-2927257     | 6 | - | 99837012-99862096   | 100.0 |
| 4 | 40208937-40273954   | 9 | + | 35807736-35872186   | 9 | + | 37998925-38063449   | 99.9  |
| 4 | 46677845-46706802   | 9 | - | 92588673-92619579   | 9 | + | 92822471-92853377   | 100.0 |
| 4 | 48283131-48294460   | 4 | + | 28626621-28638206   | 4 | + | 28736354-28747935   | 100.0 |
| 4 | 73105715-73127834   | 6 | - | 119160670-119176085 | 9 | + | 4865270-4880759     | 98.6  |
| 4 | 9909784-99121412    | 1 | - | 47435393-47452083   | 1 | - | 47830649-47847442   | 99.9  |
| 4 | 102318226-102328736 | 1 | - | 60357798-60370021   | 1 | - | 60380464-60392687   | 99.8  |
| 4 | 105703807-105744055 | 1 | - | 56125218-56175397   | 1 | - | 56242330-56290976   | 99.7  |
| 4 | 107619907-107677264 | 1 | + | 53333427-53402919   | 1 | + | 54523320-54593125   | 96.4  |
| 4 | 112264684-112283255 | 1 | - | 50548813-50564503   | 1 | - | 51035895-51051586   | 73.3  |

|   |                     |   |   |                   |   |   |                   |       |
|---|---------------------|---|---|-------------------|---|---|-------------------|-------|
| 4 | 128463436-128489043 | 1 | - | 30440631-30464533 | 1 | + | 30804975-30829869 | 99.9  |
| 4 | 131538691-131553830 | 1 | - | 28719438-28734219 | 1 | + | 28829068-28843847 | 58.0  |
| 4 | 134528123-134544253 | 1 | - | 22694127-22718418 | 1 | - | 22818083-22841009 | 99.7  |
| 4 | 137212220-137251624 | 1 | - | 17540318-17582519 | 1 | - | 18992953-19035454 | 91.7  |
| 4 | 137253829-137272860 | 1 | - | 17514420-17537605 | 1 | - | 18967054-18990240 | 100.0 |
| 4 | 137952719-137991608 | 1 | - | 18088610-18116529 | 1 | - | 18885901-18913820 | 100.0 |
| 4 | 143862273-143939428 | 1 | - | 10337490-10456137 | 1 | - | 12836907-12955554 | 77.6  |
| 4 | 143941283-143951446 | 1 | - | 10326284-10336565 | 1 | - | 12825699-12835984 | 100.0 |
| 4 | 146251726-146264747 | 1 | - | 7289470-7303058   | 1 | + | 7386746-7400336   | 99.9  |
| 5 | 12460720-12478216   | 7 | - | 85215903-85236717 | 7 | - | 85311283-85332064 | 99.8  |
| 5 | 18395653-18490801   | 7 | + | 60842654-60935339 | 7 | - | 79799291-79891956 | 99.8  |
| 5 | 18508765-18577403   | 7 | + | 60955645-61000170 | 7 | - | 79734490-79778986 | 88.7  |
| 5 | 18841216-18904211   | 7 | - | 79275984-79349405 | 7 | - | 79428117-79501519 | 99.8  |
| 5 | 33154408-33167903   | 4 | + | 3756841-3774339   | 4 | + | 3828496-3846125   | 99.8  |
| 5 | 34406375-34438106   | 4 | + | 9067575-9109269   | 4 | - | 9275093-9316763   | 99.7  |
| 5 | 44409866-44429202   | 4 | + | 17781986-17804671 | 4 | + | 18996849-19019528 | 99.8  |
| 5 | 52115526-52135519   | 4 | - | 27594956-27615586 | 4 | + | 27728716-27749347 | 100.0 |
| 5 | 52699904-52719001   | 4 | + | 28612234-28638206 | 4 | + | 28721967-28747935 | 66.4  |
| 5 | 52721210-52770933   | 4 | + | 28640505-28696918 | 4 | + | 28750234-28804468 | 99.8  |
| 5 | 103538786-103577440 | 1 | + | 94682876-94733100 | 1 | + | 94815034-94865261 | 94.2  |

|   |                     |    |   |                     |    |   |                     |       |
|---|---------------------|----|---|---------------------|----|---|---------------------|-------|
| 5 | 104460737-104482919 | 1  | - | 96261324-96284491   | 1  | - | 96416814-96439738   | 98.5  |
| 5 | 104827989-104875613 | 1  | + | 96594578-96635519   | 1  | + | 96713977-96753661   | 99.8  |
| 5 | 113134998-113160195 | 12 | - | 126877220-126903508 | 12 | - | 126969803-126996060 | 87.5  |
| 5 | 121729861-121741536 | 12 | + | 128899830-128913654 | 12 | + | 128995920-129009742 | 70.1  |
| 5 | 131169431-131205231 | 7  | - | 69750408-69807971   | 7  | + | 73067850-73125461   | 74.8  |
| 5 | 133815558-133826080 | 7  | - | 73880307-73893748   | 7  | - | 73899375-73912816   | 100.0 |
| 5 | 134843735-134869209 | 7  | - | 102162559-102191450 | 7  | - | 102351484-102380364 | 99.7  |
| 5 | 136196541-136237400 | 7  | + | 102692474-102730128 | 7  | + | 103551153-103590479 | 99.5  |
| 5 | 136855503-136877159 | 7  | - | 100870799-100897450 | 7  | + | 103644408-103671059 | 100.0 |
| 5 | 143210008-143265426 | 7  | - | 99576345-99643214   | 7  | - | 99874513-99941382   | 100.0 |
| 6 | 14315547-14343149   | 7  | - | 125427894-125440448 | 7  | + | 126444574-126457132 | 99.9  |
| 6 | 14360524-14373640   | 7  | + | 125380465-125391747 | 7  | + | 126492584-126503864 | 99.8  |
| 6 | 24666335-24699479   | 7  | + | 123677898-123712913 | 7  | + | 124773248-124807084 | 99.9  |
| 6 | 31241702-31279124   | 7  | + | 134509359-134556828 | 7  | + | 140185800-140233270 | 99.9  |
| 6 | 34055285-34071069   | 7  | + | 137316672-137333030 | 7  | + | 140312599-140328960 | 99.8  |
| 6 | 37215097-37235639   | 7  | + | 141247362-141265471 | 7  | + | 142597306-142615427 | 99.9  |
| 6 | 47550505-47561187   | 7  | + | 152446826-152471793 | 7  | + | 153188874-153213838 | 99.8  |
| 6 | 83479929-83537816   | 2  | + | 76027059-76088279   | 2  | - | 76161126-76222330   | 99.8  |
| 6 | 87106274-87126684   | 2  | - | 66691366-66728827   | 2  | - | 68038325-68075786   | 100.0 |
| 6 | 92227564-92270560   | 3  | + | 16292272-16348933   | 3  | + | 20739887-20796486   | 99.8  |

|   |                     |    |   |                     |    |   |                     |       |
|---|---------------------|----|---|---------------------|----|---|---------------------|-------|
| 6 | 101063430-101085485 | 3  | + | 75072074-75099167   | 3  | + | 75127494-75154587   | 90.8  |
| 6 | 105502462-105523268 | 3  | + | 3060475-3084034     | 3  | + | 20082644-20106187   | 99.7  |
| 6 | 107584714-107598910 | 3  | + | 4917864-4928948     | 3  | + | 20175263-20186347   | 100.0 |
| 6 | 108246120-108277539 | 3  | + | 5494508-5529530     | 3  | + | 12221042-12256076   | 82.3  |
| 6 | 108910813-108947333 | 3  | - | 555642-604453       | 3  | + | 6123849-6172660     | 100.0 |
| 6 | 109321508-109349995 | 3  | + | 329750-359176       | 3  | + | 6587811-6617237     | 100.0 |
| 6 | 114006015-114017844 | 3  | - | 889793-902937       | 3  | + | 11233755-11246889   | 100.0 |
| 6 | 114025730-114058127 | 3  | - | 849258-878641       | 3  | + | 11258041-11287427   | 100.0 |
| 6 | 114059611-114083112 | 3  | - | 818522-847686       | 3  | + | 11288999-11317181   | 100.0 |
| 6 | 115846851-115889695 | 3  | + | 14119703-14164652   | 3  | + | 20420421-20465376   | 99.9  |
| 6 | 116699680-116710550 | 3  | + | 134049761-134062546 | 3  | + | 134161761-134174545 | 100.0 |
| 6 | 116714631-116750626 | 3  | + | 134069647-134114625 | 3  | + | 134181646-134226602 | 85.6  |
| 6 | 119124471-119160393 | 10 | + | 58614366-58679855   | 10 | + | 58718756-58784245   | 99.8  |
| 6 | 134587897-134602822 | 12 | + | 12267503-12284185   | 12 | + | 12379764-12396447   | 99.8  |
| 6 | 135897809-136047154 | 12 | + | 12920323-13064279   | 12 | + | 14050187-14194142   | 97.9  |
| 6 | 148017081-148099521 | 8  | + | 132528272-132630403 | 12 | + | 29744152-29846277   | 99.9  |
| 6 | 149616502-149635407 | 12 | + | 32478811-32498941   | 12 | + | 36190270-36210402   | 100.0 |
| 6 | 150242819-150268423 | 12 | + | 21799470-21844501   | 12 | + | 21942663-21987715   | 99.8  |
| 7 | 4419730-4435197     | 19 | + | 73673131-73689502   | 19 | + | 73885635-73901987   | 99.9  |
| 7 | 33404021-33417639   | 19 | - | 68113058-68133378   | 19 | - | 68394981-68415293   | 99.4  |

|   |                     |    |   |                     |    |   |                     |       |
|---|---------------------|----|---|---------------------|----|---|---------------------|-------|
| 7 | 34869553-34886078   | 19 | - | 66256947-66286184   | 19 | - | 66482619-66513692   | 99.6  |
| 7 | 63436277-63453309   | 15 | - | 89411677-89426786   | 15 | + | 89763214-89778303   | 99.9  |
| 7 | 67046767-67277848   | 15 | + | 83275972-83464779   | 15 | + | 84621821-84813065   | 100.0 |
| 7 | 69795252-69807311   | 15 | + | 88788617-88803056   | 15 | + | 88811445-88825881   | 99.8  |
| 7 | 92268906-92293049   | 11 | + | 3291796-3326673     | 11 | - | 3932627-3964667     | 96.0  |
| 7 | 99171857-99231094   | 11 | + | 8361576-8431365     | 11 | + | 8680716-8752696     | 99.8  |
| 7 | 99659564-99682117   | 11 | + | 9246638-9290620     | 11 | + | 9488718-9533684     | 99.8  |
| 7 | 121084313-121094463 | 10 | + | 132589806-132599961 | 11 | + | 102488472-102498623 | 100.0 |
| 7 | 123545180-123568697 | 10 | + | 33634345-33657620   | 10 | + | 133937832-133961135 | 99.8  |
| 7 | 130202385-130213703 | 10 | - | 141535351-141547853 | 10 | - | 141727305-141738684 | 99.6  |
| 7 | 132985365-132998725 | 11 | - | 483697-499764       | 11 | + | 682107-698186       | 99.7  |
| 7 | 133917170-133943654 | 11 | - | 1769860-1789892     | 11 | - | 1928293-1948220     | 99.8  |
| 8 | 14640168-14658230   | 8  | + | 948128-971872       | 8  | + | 1138243-1162035     | 98.9  |
| 8 | 16627830-16671499   | 8  | + | 3559167-3616447     | 8  | + | 3748715-3806011     | 99.5  |
| 8 | 18085137-18095372   | 8  | + | 4903312-4915016     | 8  | + | 4930174-4941889     | 99.8  |
| 8 | 25151200-25288992   | 8  | + | 38184580-38318334   | 8  | - | 93657691-93791915   | 99.2  |
| 8 | 29410176-29433865   | 8  | - | 34531393-34557493   | 8  | + | 34786585-34812689   | 99.8  |
| 8 | 35053763-35071420   | 8  | + | 7583899-7602894     | 8  | + | 7636667-7655664     | 99.9  |
| 8 | 40400489-40417765   | 8  | + | 17086374-17099796   | 8  | + | 18100970-18114385   | 99.6  |
| 8 | 40420654-40473736   | 8  | + | 17102018-17155957   | 8  | + | 18116620-18170572   | 99.4  |

|   |                     |    |   |                     |    |   |                     |       |
|---|---------------------|----|---|---------------------|----|---|---------------------|-------|
| 8 | 45686556-45704107   | 4  | - | 185632590-185646866 | 4  | - | 185701632-185715905 | 82.5  |
| 8 | 64812730-64853293   | 4  | - | 171138243-171164052 | 4  | - | 171240643-171266468 | 99.9  |
| 8 | 87057347-87067670   | 16 | + | 51850443-51863455   | 16 | + | 51889191-51902152   | 99.8  |
| 8 | 88113185-88125693   | 16 | + | 19655871-19672488   | 16 | + | 20041132-20057749   | 100.0 |
| 8 | 91104420-91123221   | 16 | + | 55699883-55724295   | 16 | + | 56197962-56222374   | 100.0 |
| 8 | 104414089-104452678 | 16 | - | 69291578-69337531   | 16 | - | 69413274-69459208   | 99.8  |
| 8 | 105167739-105198393 | 16 | + | 69832286-69861322   | 16 | + | 70132025-70161056   | 85.3  |
| 8 | 110121841-110183614 | 16 | + | 74471617-74552798   | 16 | - | 74713543-74794828   | 99.9  |
| 8 | 110439778-110470872 | 16 | - | 73674206-73708487   | 16 | - | 73776256-73810536   | 83.4  |
| 8 | 110860384-110873372 | 16 | - | 73154672-73171942   | 16 | - | 73339970-73357243   | 99.9  |
| 8 | 118029163-118053996 | 16 | + | 87234631-87248872   | 16 | + | 88301937-88316163   | 99.9  |
| 8 | 118147140-118159557 | 16 | + | 87348964-87360952   | 16 | + | 88319187-88331004   | 100.0 |
| 8 | 119762962-119776765 | 16 | + | 81909424-81932403   | 16 | + | 82092322-82115281   | 99.6  |
| 9 | 15549289-15561164   | 11 | - | 94835810-94851346   | 11 | - | 94932719-94948256   | 99.9  |
| 9 | 29731330-29766031   | 11 | + | 136944888-136976883 | 11 | + | 137988837-138020846 | 99.8  |
| 9 | 32598838-32609934   | 11 | + | 133769561-133779726 | 11 | + | 134855335-134865495 | 99.8  |
| 9 | 33967246-33991322   | 11 | - | 133251456-133276936 | 11 | - | 133507754-133533235 | 100.0 |
| 9 | 40835225-40921271   | 11 | - | 128420891-128502662 | 11 | + | 130181228-130262995 | 97.4  |
| 9 | 40960631-40973703   | 11 | - | 128347202-128360652 | 11 | - | 130143594-130156999 | 100.0 |
| 9 | 41650500-41661818   | 11 | - | 127228327-127238579 | 11 | - | 127448119-127458372 | 99.7  |

|    |                     |    |   |                     |    |   |                     |       |
|----|---------------------|----|---|---------------------|----|---|---------------------|-------|
| 9  | 45195067-45208236   | 11 | + | 121256696-121270856 | 11 | + | 123900065-123914232 | 100.0 |
| 9  | 49170388-49189661   | 11 | - | 119074567-119094188 | 11 | - | 120735302-120754920 | 99.9  |
| 9  | 64407092-64462981   | 15 | + | 63708302-637752236  | 15 | - | 64136501-64203440   | 99.8  |
| 9  | 65246162-65258039   | 15 | - | 62895430-62915289   | 15 | - | 63018642-63038518   | 100.0 |
| 9  | 68128158-68230586   | 15 | - | 58665310-58777008   | 15 | - | 59166485-59279901   | 99.8  |
| 9  | 77918954-77942362   | 6  | - | 57071251-57095850   | 6  | - | 57443525-57468114   | 99.7  |
| 9  | 84207494-84333869   | 6  | + | 84860992-84978395   | 6  | + | 94304775-94422346   | 99.8  |
| 9  | 101491659-101519559 | 3  | - | 141154793-141165175 | 3  | + | 141264760-141275136 | 99.9  |
| 9  | 111160230-111173618 | 3  | - | 50704110-50718576   | 3  | - | 50729620-50744086   | 100.0 |
| 9  | 120367938-120383217 | 3  | + | 41069343-41089370   | 3  | + | 41540492-41560493   | 99.7  |
| 10 | 9242483-9253677     | 6  | - | 146741530-146751559 | 6  | - | 155122420-155132449 | 100.0 |
| 10 | 53582605-53613728   | 6  | + | 121774682-121804273 | 6  | + | 125214382-125243973 | 100.0 |
| 10 | 69381895-69400174   | 10 | - | 62451551-62475080   | 10 | - | 62851506-62875027   | 99.8  |
| 10 | 70875639-70913342   | 10 | - | 60351833-60395447   | 10 | - | 60592294-60635908   | 99.9  |
| 10 | 87061142-87080887   | 3  | - | 21665155-21683396   | 12 | - | 108968898-108987140 | 100.0 |
| 10 | 87111224-87143518   | 3  | - | 21606677-21643725   | 12 | - | 108910466-108947460 | 99.9  |
| 10 | 88942829-88961288   | 12 | - | 104324814-104353915 | 12 | - | 104468245-104497345 | 100.0 |
| 10 | 91933219-91973163   | 12 | - | 100554513-100598601 | 12 | - | 117619349-117663432 | 99.9  |
| 10 | 93043554-93130922   | 12 | + | 98944704-99030954   | 12 | - | 99302245-99388509   | 100.0 |
| 10 | 120391808-120447853 | 12 | + | 68940927-69020562   | 12 | - | 69090633-69170446   | 99.9  |

|    |                     |    |   |                     |    |   |                     |       |
|----|---------------------|----|---|---------------------|----|---|---------------------|-------|
| 10 | 121650465-121668956 | 12 | + | 70004452-70032173   | 12 | - | 70253042-70280946   | 99.9  |
| 10 | 127126532-127154419 | 12 | + | 60595993-60618178   | 12 | + | 61988866-62011048   | 99.7  |
| 10 | 127172797-127187674 | 12 | + | 60629683-60651012   | 12 | + | 62031410-62052745   | 89.3  |
| 10 | 129230421-129243538 | 12 | + | 59337743-59349334   | 12 | + | 59359366-59370958   | 79.4  |
| 11 | 25400222-25476403   | 2  | - | 56673156-56737207   | 2  | - | 60406305-60470356   | 100.0 |
| 11 | 25480210-25608201   | 2  | - | 56543662-56666317   | 2  | - | 60277297-60399466   | 84.6  |
| 11 | 38095825-38122972   | 5  | - | 173394236-173417131 | 12 | - | 130172858-130195754 | 99.8  |
| 11 | 40852520-40864432   | 5  | + | 170026587-170037361 | 5  | - | 170138814-170149716 | 99.9  |
| 11 | 53276847-53288091   | 5  | - | 132426812-132437966 | 5  | + | 132589998-132601155 | 100.0 |
| 11 | 56265823-56340190   | 5  | + | 156119708-156185591 | 5  | + | 158371905-158437778 | 99.9  |
| 11 | 64180430-64234395   | 17 | + | 15322811-15409673   | 17 | + | 18500279-18587823   | 99.9  |
| 11 | 66789571-66944996   | 17 | - | 8707877-8878462     | 17 | - | 12904976-13075689   | 99.8  |
| 11 | 69108301-69122398   | 17 | + | 9721510-9732735     | 17 | + | 9913649-9924873     | 100.0 |
| 11 | 69237656-69254916   | 17 | - | 10462893-10476676   | 17 | - | 10507430-10521207   | 99.8  |
| 11 | 70605622-70616046   | 17 | - | 7558365-7569398     | 17 | - | 7662041-7673028     | 99.9  |
| 11 | 71092576-71143384   | 17 | + | 4861930-4909594     | 17 | + | 4971234-5018938     | 93.5  |
| 11 | 73712892-73729245   | 17 | - | 3754289-3779763     | 17 | - | 3809217-3834827     | 99.9  |
| 11 | 75746843-75757636   | 17 | - | 1753623-1767010     | 17 | - | 2148410-2161797     | 99.9  |
| 11 | 78122428-78140474   | 17 | - | 28565629-28585233   | 17 | - | 28607512-28627117   | 99.9  |
| 11 | 81123096-81164272   | 17 | + | 31524993-31583743   | 17 | + | 31642925-31701668   | 90.1  |

|    |                     |    |   |                     |    |   |                     |       |
|----|---------------------|----|---|---------------------|----|---|---------------------|-------|
| 11 | 85066873-85089181   | 17 | - | 35981987-36010548   | 17 | - | 36075414-36103972   | 80.1  |
| 11 | 96888383-96904950   | 17 | - | 49482980-49496817   | 17 | - | 49549676-49563514   | 100.0 |
| 11 | 97374465-97391423   | 4  | - | 3389679-3406597     | 17 | - | 48886363-48903279   | 74.3  |
| 11 | 97399395-97419640   | 4  | - | 3348132-3366899     | 17 | - | 48861502-48880269   | 100.0 |
| 11 | 105012871-105152583 | 17 | + | 46367836-46556028   | 17 | + | 47898717-48085578   | 99.9  |
| 11 | 106559602-106605559 | 12 | + | 67722988-67804633   | 17 | + | 65213346-65294993   | 97.0  |
| 11 | 116736663-116747450 | 17 | + | 76961233-76978470   | 17 | - | 77144443-77161617   | 99.6  |
| 11 | 116871171-116886258 | 17 | + | 77117236-77133456   | 17 | + | 77212348-77228495   | 99.7  |
| 11 | 119418583-119435635 | 17 | + | 80657987-80677071   | 17 | + | 80712827-80731847   | 100.0 |
| 12 | 5784490-5806159     | 2  | - | 22463569-22485345   | 2  | - | 22519794-22541577   | 87.6  |
| 12 | 34378289-34392611   | 7  | - | 114517219-114533112 | 7  | - | 114582908-114598789 | 99.9  |
| 12 | 34656195-34673813   | 5  | + | 107402911-107425698 | 7  | - | 114218444-114241115 | 88.2  |
| 12 | 38008304-38043360   | 7  | + | 111132760-111150513 | 17 | + | 43767850-43785603   | 100.0 |
| 12 | 70583438-70627201   | 14 | + | 60663746-60714778   | 14 | + | 62732951-62784027   | 99.9  |
| 12 | 70719772-70740074   | 14 | + | 60716835-60748255   | 14 | + | 62898427-62929857   | 99.9  |
| 12 | 74417765-74436735   | 14 | + | 64659449-64676247   | 14 | + | 67209448-67226246   | 100.0 |
| 12 | 87077532-87107867   | 14 | + | 81659784-81695683   | 14 | + | 81721457-81757326   | 99.5  |
| 12 | 90781918-90862010   | 14 | + | 85486384-85566871   | 14 | + | 85806582-85886739   | 96.1  |
| 12 | 92706606-92718510   | 14 | + | 85788660-85801082   | 14 | + | 87706949-87719375   | 82.1  |
| 12 | 96873473-96896714   | 14 | + | 92683866-92712427   | 14 | + | 92801408-92828829   | 97.5  |

|    |                     |   |   |                     |    |   |                     |       |
|----|---------------------|---|---|---------------------|----|---|---------------------|-------|
| 12 | 112228267-112292383 | 7 | - | 16145628-16190084   | 7  | - | 16395437-16440016   | 99.8  |
| 13 | 30667093-30686633   | 6 | + | 1110626-1138166     | 6  | + | 4056613-4084153     | 100.0 |
| 13 | 30702753-30789358   | 6 | + | 1152195-1271392     | 6  | + | 4097601-4217328     | 99.9  |
| 13 | 36333945-36387616   | 6 | + | 8882791-8932113     | 6  | + | 17951746-18001059   | 95.4  |
| 13 | 37542926-37600121   | 6 | + | 4287294-4336155     | 6  | + | 10202309-10251187   | 100.0 |
| 13 | 37819569-37835096   | 6 | + | 10457901-10470258   | 6  | + | 17921034-17933391   | 100.0 |
| 13 | 37852375-37874405   | 6 | + | 10488128-10508263   | 6  | + | 17869429-17889564   | 100.0 |
| 13 | 48696044-48712504   | 9 | - | 86060481-86078082   | X  | + | 7400329-7417942     | 86.7  |
| 13 | 49344756-49361656   | 9 | - | 84980354-84996337   | 9  | - | 85117511-85133495   | 100.0 |
| 13 | 51884409-51964549   | 9 | + | 82407955-82540283   | 9  | + | 82798071-82930466   | 99.9  |
| 13 | 54476917-54495636   | 5 | - | 181267971-181290631 | 5  | - | 181301349-181324045 | 87.4  |
| 13 | 55475686-55491669   | 5 | - | 137208757-137226885 | 11 | + | 45359582-45377694   | 99.9  |
| 13 | 70622192-70635804   | 5 | + | 945663-957681       | 5  | + | 1070834-1083752     | 99.1  |
| 13 | 71100586-71110880   | 5 | - | 1446063-1459043     | 5  | - | 1614458-1627074     | 99.5  |
| 13 | 71306726-71327834   | 5 | + | 222773-246041       | 5  | + | 452647-475790       | 98.5  |
| 13 | 73052859-73083584   | 5 | - | 92148011-92171999   | 5  | + | 97202901-97226880   | 100.0 |
| 13 | 77614051-77632430   | 5 | - | 64345365-64365434   | 5  | - | 96713419-96733585   | 99.7  |
| 13 | 86227333-86279363   | 5 | - | 84906134-84951968   | 5  | - | 85058174-85104004   | 79.1  |
| 13 | 86779318-86795854   | 5 | - | 84532392-84554409   | 5  | + | 94050043-94071796   | 88.7  |
| 13 | 86803098-86827329   | 5 | - | 84496952-84523156   | 5  | + | 94081032-94107193   | 99.2  |

|    |                     |    |   |                    |    |   |                     |       |
|----|---------------------|----|---|--------------------|----|---|---------------------|-------|
| 13 | 86833915-86846280   | 5  | - | 84472081-84485331  | 5  | + | 94118783-94132031   | 99.1  |
| 13 | 100131241-100150366 | 5  | - | 68206509-682223466 | 5  | - | 68619203-68636161   | 100.0 |
| 13 | 109145319-109171825 | 5  | - | 51603440-51656135  | 5  | - | 51744676-51797357   | 99.8  |
| 14 | 5600324-5670528     | 3  | + | 63386625-63457073  | 3  | + | 63644336-63714898   | 99.4  |
| 14 | 15930388-15951542   | 10 | - | 78884103-78898296  | 10 | - | 78920345-78934580   | 99.8  |
| 14 | 19737083-19796601   | 10 | + | 87120816-87185739  | 10 | + | 87203284-87268244   | 99.8  |
| 14 | 21879523-21893069   | 3  | + | 60245764-60257821  | 3  | - | 60304777-60316834   | 100.0 |
| 14 | 46729248-46740752   | 14 | + | 22089053-22104574  | 14 | + | 22183364-22197915   | 99.6  |
| 14 | 48433123-48445458   | 13 | + | 17483019-17493203  | 13 | + | 19506522-19516706   | 100.0 |
| 14 | 50904487-50971537   | 13 | - | 25084427-25153297  | 13 | - | 25217459-25290341   | 99.9  |
| 14 | 56730767-56746448   | 8  | + | 28295737-28309819  | 8  | - | 28604834-28618914   | 99.9  |
| 14 | 63709141-63756940   | 13 | - | 48843729-48875266  | 13 | - | 50267014-50298549   | 99.9  |
| 14 | 85672395-85683313   | 3  | + | 917881-932659      | 13 | + | 68441046-68455845   | 99.9  |
| 14 | 97504394-97518927   | 10 | - | 85883674-85895796  | 13 | + | 81441755-81454382   | 96.1  |
| 14 | 110360191-110383216 | 13 | - | 94908101-94929655  | 18 | - | 64391970-64413552   | 99.8  |
| 15 | 6060427-6083153     | 5  | - | 36448005-36468805  | 5  | - | 36609553-36630342   | 99.9  |
| 15 | 12702606-12784103   | 5  | - | 26153676-26243013  | 5  | - | 26319746-26409438   | 99.7  |
| 15 | 31862444-31903855   | 5  | + | 11564235-11605768  | 5  | + | 11811477-11853024   | 99.9  |
| 15 | 32910096-33138252   | 8  | + | 94528519-94706196  | 8  | - | 109587021-109764970 | 99.8  |
| 15 | 33688667-33722532   | 8  | + | 95242992-95260127  | 8  | + | 97045291-97062426   | 100.0 |

|    |                     |    |   |                     |    |   |                     |       |
|----|---------------------|----|---|---------------------|----|---|---------------------|-------|
| 15 | 34217536-34234825   | 8  | + | 93874792-93894937   | 8  | + | 95772659-95792768   | 99.9  |
| 15 | 42721529-42767498   | 8  | + | 106705473-106750531 | 8  | + | 107979357-108023948 | 99.5  |
| 15 | 51192784-51204955   | 8  | + | 116648543-116658803 | 8  | + | 116891010-116901271 | 99.9  |
| 15 | 59779463-59791159   | 8  | - | 125570763-125584984 | 8  | - | 126639812-126654031 | 99.1  |
| 15 | 63350339-63361642   | 8  | - | 129911469-129922258 | 8  | + | 130549044-130559833 | 100.0 |
| 15 | 65167388-65188765   | 8  | + | 132052565-132074980 | 8  | + | 132349278-132371691 | 99.8  |
| 15 | 99683947-99719329   | 12 | - | 51334814-51368736   | 12 | + | 51379454-51413348   | 99.9  |
| 15 | 99719539-99768642   | 12 | + | 51271208-51316777   | 12 | + | 51413541-51459103   | 94.0  |
| 15 | 100149671-100168437 | 12 | - | 52010534-52029237   | 12 | - | 52132293-52150996   | 100.0 |
| 15 | 102211032-102250847 | 12 | + | 54784760-54827747   | 12 | + | 54841617-54884573   | 93.9  |
| 15 | 103505540-103521703 | 12 | + | 56238499-56255618   | 12 | + | 56276019-56293139   | 100.0 |
| 15 | 103565290-103576644 | 12 | - | 56430657-56441505   | 12 | + | 57202298-57213142   | 99.9  |
| 16 | 4066764-4112194     | 16 | + | 4186379-4243027     | 16 | + | 4376649-4430961     | 98.8  |
| 16 | 10635854-10649432   | 16 | - | 12064825-12078921   | 16 | + | 20717458-20731554   | 100.0 |
| 16 | 10684268-10705226   | 16 | - | 11974474-12000563   | 16 | + | 20795824-20821936   | 100.0 |
| 16 | 23282468-23331357   | 3  | + | 193222590-193268367 | 3  | + | 193372533-193416772 | 100.0 |
| 16 | 29555034-29566386   | 3  | - | 200335575-200345581 | 3  | + | 200416106-200426124 | 99.8  |
| 16 | 51389855-51421095   | 3  | - | 109653546-109672899 | 3  | - | 109751720-109770948 | 99.3  |
| 16 | 58438826-58466337   | 3  | - | 101837866-101856191 | 3  | - | 101939020-101957341 | 99.7  |
| 16 | 79104472-79132850   | 21 | + | 15796716-15818209   | 21 | + | 15833311-15854804   | 100.0 |

|    |                   |    |   |                     |    |   |                     |       |
|----|-------------------|----|---|---------------------|----|---|---------------------|-------|
| 16 | 79264067-79304980 | 5  | + | 120610418-120669929 | 21 | + | 16024225-16083736   | 99.9  |
| 16 | 82293483-82340811 | 4  | + | 111500229-111528772 | 21 | + | 19555069-19583603   | 99.8  |
| 17 | 9675253-9703950   | 6  | - | 118852227-118893140 | 6  | - | 170851978-170893226 | 99.6  |
| 17 | 13588331-13614832 | 6  | + | 176284138-176356202 | 6  | + | 176836130-176908238 | 99.8  |
| 17 | 33294923-33305916 | 6  | - | 32373145-32384002   | 6  | - | 42689896-42700754   | 100.0 |
| 17 | 33306499-33326789 | 6  | - | 32355187-32372150   | 6  | - | 42671938-42688901   | 99.9  |
| 17 | 34269741-34284239 | 6  | + | 27053861-27068848   | 6  | - | 41514883-41529925   | 99.3  |
| 17 | 66910416-66931416 | 18 | - | 7172331-7195303     | 18 | - | 7235323-7258291     | 99.5  |
| 17 | 77459640-77660198 | 2  | + | 36160732-36383798   | 2  | + | 50240758-50463964   | 71.9  |
| 17 | 87005006-87035453 | 2  | + | 47363197-47421847   | 2  | + | 47532332-47590358   | 82.8  |
| 18 | 13002944-13033224 | 18 | + | 23015955-23039532   | 18 | + | 23091325-23114921   | 99.9  |
| 18 | 15536797-15564993 | 18 | + | 25368867-25391064   | 18 | - | 25594865-25617119   | 99.3  |
| 18 | 20918508-20932892 | 18 | + | 30339326-30362064   | 18 | + | 30432841-30455578   | 89.6  |
| 18 | 23660970-23685110 | 18 | + | 33089661-33118011   | 18 | + | 33220739-33249138   | 90.8  |
| 18 | 32257538-32270062 | 2  | + | 124296285-124319023 | 2  | - | 124433753-124456482 | 99.8  |
| 18 | 36958073-36975810 | 5  | + | 141086770-141106091 | 5  | + | 142522271-142541599 | 99.8  |
| 18 | 38965616-39003017 | 5  | - | 142692262-142735868 | 5  | - | 142970242-143014150 | 99.7  |
| 18 | 41003551-41035543 | 5  | + | 153369028-153395565 | 11 | - | 136068566-136095103 | 100.0 |
| 18 | 47332301-47396404 | 5  | + | 120486895-120542402 | 5  | + | 120735159-120790644 | 94.4  |
| 18 | 50385625-50418328 | 5  | + | 103274543-103309906 | 5  | + | 103379827-103415185 | 92.9  |

|    |                   |    |   |                     |    |   |                     |       |
|----|-------------------|----|---|---------------------|----|---|---------------------|-------|
| 18 | 54824552-54839755 | 5  | + | 126703450-126719035 | 5  | + | 126830632-126846269 | 99.9  |
| 18 | 65495870-65508812 | 18 | + | 592334583-59248837  | 18 | + | 59402500-59416763   | 79.2  |
| 18 | 69989342-70003304 | 18 | - | 54193516-54208523   | 18 | - | 54358612-54373616   | 80.7  |
| 18 | 75170114-75181180 | 18 | - | 49420035-49430736   | 18 | - | 49464658-49475359   | 99.9  |
| 18 | 78666839-78680356 | 18 | - | 45025328-45044262   | 18 | - | 45414746-45433680   | 100.0 |
| 18 | 79341635-79360693 | 18 | - | 44270771-44293507   | 18 | - | 44318041-44340779   | 100.0 |
| 18 | 82003779-82035954 | 18 | + | 79469492-79517098   | 18 | + | 79616797-79664406   | 93.1  |
| 18 | 85091590-85127035 | 18 | - | 75322091-75355595   | 18 | - | 75392423-75425954   | 99.7  |
| 18 | 89812828-89837642 | 18 | - | 70447857-70477544   | 18 | + | 70841016-70872296   | 87.0  |
| 19 | 32541516-32560696 | 10 | + | 93457006-93488881   | 10 | + | 98684142-98715118   | 77.5  |
| 19 | 32629112-32674684 | 10 | + | 93599257-93640637   | 10 | + | 98825502-98866905   | 99.9  |
| 19 | 33691348-33702671 | 10 | + | 94360965-94372929   | 10 | + | 94691509-94703434   | 99.8  |
| 19 | 36843313-36857209 | 10 | + | 94797405-94857617   | 10 | + | 98237713-98297943   | 91.9  |
| 19 | 37550898-37568667 | 10 | + | 99318552-99340195   | 10 | + | 99743269-99764916   | 99.8  |
| 19 | 41772165-41814671 | 10 | + | 104198967-104243567 | 10 | - | 104306426-104351026 | 100.0 |
| 19 | 47275069-47288644 | 10 | + | 110290034-110314536 | 10 | + | 110935376-110959953 | 99.7  |
| 19 | 58511564-58544715 | 10 | + | 124053152-124081995 | 10 | - | 125402880-125431736 | 99.8  |
| 19 | 58554706-58586588 | 10 | + | 124091732-124125847 | 10 | - | 125359032-125393143 | 91.8  |
| 19 | 59083370-59099714 | 10 | - | 124861933-124875802 | 10 | - | 125180110-125193956 | 100.0 |
| 19 | 60260420-60272798 | 10 | + | 124634237-124648868 | 10 | + | 127677639-127692268 | 99.9  |

|    |                   |    |   |                     |    |   |                     |      |
|----|-------------------|----|---|---------------------|----|---|---------------------|------|
| 19 | 60280517-60375174 | 10 | + | 124658183-124750964 | 10 | + | 127701570-127794284 | 99.9 |
|----|-------------------|----|---|---------------------|----|---|---------------------|------|

**Supporting references and notes:**

1. N. Bray, et al. In preparation (2001)
